# Supplementary material for: Somatic determinants of changes in selected body posture parameters in younger school-age children
Source: PeerJ. 2021 Feb 10;9:e10821. doi: 10.7717/peerj.10821 (PMC7881716; doi:10.7717/peerj.10821)
Supplement: Data S1 [file peerj-09-10821-s001.xlsx]

## Sheet: Arkusz1
GENDER	body weight- I	percentiles body weight- I	body height- I	percentiles body height- I	BMI-I	percentiles BMI-I	ALFA- I	BETA- I	GAMMA- I	KKP- I	KLL- I	KNT- I	KLB- I	UL- I	TT- I	KNM- I	UK- I	POTSI- I	MI- I	KPT- I	body weight- II	percentiles body weight- II	body height- II	percentiles body height- II	BMI- II	percentiles BMI- II	ALFA- II	BETA- II	GAMMA- II	KKP- II	KLL- II	KNT- II	KLB- II	UL- II	TT- II	KNM- II	UK- II	POTSI- II	MI- II	KPT- II
K	23	85th	111	50th	18.67	97th	5.3	6.1	6.9	167.6	168.6	-0.2	2.9	1.9	0	0	3.3	16.5	4.5	-2.4	29.5	50th	129.5	50th	17.6	50th	7.2	6.3	6.1	167.6	166.5	-0.7	-5.7	-0.5	-4.8	0.5	2.3	6.1	5.4	-4.4
K	15	15th	110	50th	12.4	3th	5.1	4	9.7	165.8	170.9	-0.2	0	-5.7	-16.4	0	-5.6	9.6	8.4	1.8	22.2	15th	131	50th	12.9	3th	5.9	2.9	11.3	165.8	171.2	2	9.1	13.8	4.3	3.3	1.8	10.2	4.3	0.1
K	19	50th	115	85th	14.4	15th	4.8	13.1	13.2	165.1	162.1	-0.3	-9.6	5.7	2.9	-1.9	3.3	11.7	-0.2	-0.9	30.7	50th	137	85th	16.4	50th	4.1	4.7	10.3	165.1	171.3	1.7	-5.7	0.5	1	2.4	1.4	35	-11.2	-0.3
K	21	85th	115	85th	15.9	50th	9.9	9	10.5	167.8	161.2	1	12.4	7.6	11.6	-1	-5.1	14.4	4.7	0.6	24	15th	128.5	50th	14.5	50th	1.9	0.9	13.1	167.8	182.7	-1.3	11	7.2	2.4	2.4	2.2	13.8	-1.2	-3.4
K	15	15th	110	50th	12.4	3th	8.2	8.7	8.1	158.7	163.1	-2.7	-9.6	-11.5	-9.6	-6.7	-2.9	17.7	9.3	0.3	30.8	50th	137	85th	16.4	50th	3	8.4	12.9	158.7	168.5	4.1	16.2	13.4	-10.1	1	-1.9	12.5	18.1	2.8
K	27	97th	121	97th	18.4	85th	3.5	1.5	2.7	163.8	175	1.4	18.1	6.7	9.6	4.8	6.7	10.5	3.4	-4.1	29.5	50th	134	50th	16.4	50th	0	7.6	8.6	163.8	172.4	0.8	11	6.7	20.2	8.6	-3.1	13.2	5.1	-3.8
K	19	50th	113	50th	14.9	50th	6.4	7.6	10.4	164	165.9	-0.7	3.8	-4.8	-16.4	2.4	-1.9	26.8	-0.4	1.6	25	50th	134.5	50th	13.8	15th	4.8	6.8	9.2	164	168.4	0.9	11.9	7.2	9.6	1.4	2.2	19.5	13.4	0.5
K	23	85th	120	97th	16	50th	13.6	11.1	7.3	167.2	155.2	-0.5	1.9	5.7	2.9	1.9	-7.5	8.8	0.3	-1.8	26.9	50th	128.5	50th	16.3	50th	1.9	2.4	10.5	167.2	175.8	0.2	0	0	-9.1	5.7	-0.9	13.6	5.9	0.6
K	17	50th	107	15th	14.8	50th	13	10.9	9.7	151.1	156.1	0.4	19.1	1.9	24.1	0	-5.7	13	2.2	-4.6	27.5	50th	134.5	50th	15.2	50th	8.9	9.5	19.4	151.1	161.6	-2.7	3.8	2.4	2.4	4.3	-2.9	32.5	-1.1	0.3
K	20	50th	117	85th	14.6	50th	1.2	1.1	5.1	159.2	177.6	-0.3	12.4	11.5	-3.9	3.8	8.3	10.4	-5.3	-1.4	27.1	50th	133.5	50th	15.2	50th	0	8.4	12.4	159.2	171.6	-1.8	-1.4	-3.3	1.9	-4.3	-1.5	19.7	6.2	0
K	19	50th	114	85th	14.6	50th	6.2	5	9.9	178	168.8	-1.3	-7.6	-1	2.9	-1.9	-7.1	29.8	-1.8	-2.8	27.6	50th	133	50th	15.6	50th	18.9	0.7	2.6	178	161.8	-2.7	8.6	2.4	0	0.5	-1.4	16.1	15	-3.3
K	20	50th	112	50th	15.9	50th	13.2	10.8	8.7	155.4	156.1	-2.1	-1.9	1	1.9	-1	-9.6	42.1	-8.7	-4.1	32.8	85th	135	50th	18	50th	4.3	10.4	14.1	155.4	165.3	1	-5.7	-2.4	-25.5	1	1.7	18	9.9	-1.2
K	21	85th	113	50th	16.4	50th	4.4	10	12.3	156.6	165.6	-1.4	-1	3.8	1	-1.4	-11.2	15.9	-7.1	-1.8	23.2	15th	126	15th	14.6	50th	4.4	10.9	12.5	156.6	164.7	-0.3	6.7	4.8	-2.4	-1.4	1.8	9.3	8.6	0.6
K	15	15th	106	15th	13.3	3th	8.7	13	13.4	149.9	158.3	-1.1	-1.9	1	-1	-2.9	1	9.5	8.1	2.5	23.7	15th	128	50th	14.5	50th	0.8	13.3	16.8	149.9	167.5	-1.7	-4.8	-1	7.2	-2.4	0.9	20	8.6	-3.2
K	18	50th	108	50th	15.4	50th	7.1	3.5	5.9	163.8	169.4	0.2	3.8	-2.9	8.7	0	-7.6	20.7	3.4	-0.8	31.6	50th	137	85th	16.8	50th	6.1	5.5	10.7	163.8	168.4	0.2	13.4	11	-5.8	2.4	-3.7	21.2	10.4	-3.5
K	25	97th	123	97th	16.5	85th	9.3	15	3.5	154	155.7	-1.3	-6.2	-1.4	6.7	1.4	-5.1	4.5	-7.7	6.1	29.8	50th	134.5	50th	16.5	50th	5.4	12.3	13.7	154	162.3	0.4	-3.3	2.4	-6.3	0	-3.3	17.1	12.4	0.7
K	20	50th	112	50th	15.9	50th	1	11.3	13.9	169.1	167.7	0.5	5.7	3.8	4.8	1	-5.3	35.1	2.3	-5.7	30.4	50th	134	50th	16.9	50th	2.7	2.6	8.3	169.1	174.7	-0.8	-1.4	-7.6	1	-0.5	-2.6	14.6	-16.2	-4.9
K	17	50th	110	50th	14	15th	8	12.3	17.3	164.9	159.8	-0.9	-3.8	-3.8	5.8	-1	3.9	21.7	-12.1	0	24.7	50th	127.5	50th	15.2	50th	11.1	5	10.1	164.9	164	-0.8	9.6	5.7	21.7	-7.2	1.2	30.1	9.9	-0.5
K	23	85th	123	97th	15.2	50th	17.3	5.7	3.6	164.3	156.9	-1.7	4.8	13.4	9.6	-3.8	-6.3	26.4	0.5	0.3	39.7	97th	145.5	97th	18.8	85th	10.4	4.5	11.2	164.3	165.1	0.3	-4.8	-6.2	1.4	-0.5	-1.8	18.9	8.1	1.1
K	17	50th	112	50th	13.6	15th	8.1	6.1	11.5	169.4	165.8	0	0	-1	6.7	0	-4.2	26.5	3.2	-0.4	25	50th	134	50th	13.9	15th	14.6	7.2	3.4	169.4	158.2	0.3	-6.2	2.4	-11.6	1.4	-1.9	16.1	17.6	3.4
K	19	50th	112	50th	15.1	50th	6.2	7.2	11.9	166.4	166.6	-0.8	-20.1	-11.5	-20.2	4.8	-1.9	30.8	1.1	0.9	30.4	50th	133	50th	17.2	50th	7	7.3	6.2	166.4	165.6	-1.3	5.7	3.8	-9.6	3.3	-5.8	28.1	4.6	-3.1
K	21	85th	115	85th	15.9	50th	13	13.8	11.2	168.9	153.2	0.6	12.4	0	7.7	-3.8	-5.4	12.6	7.5	-3.1	17.5	3th	125	15th	11.2	3th	2.1	12	5.9	168.9	170.1	-0.9	7.2	8.1	-0.5	0	-3.5	23.2	8.3	1.7
K	23	85th	119	97th	16.2	50th	0	6.2	10.9	161.4	173.8	-0.4	5.3	1.9	8.7	1	-4.3	15	6.3	0.1	34.6	85th	137.5	85th	18.3	50th	8.2	11.6	7	161.4	176.6	1.2	9.6	8.1	1	1	-2	23.4	5.6	-2.3
K	17	50th	112	50th	13.6	15th	10.3	11.5	9.8	162.2	158.2	0	14.3	7.6	10.6	3.8	-6.4	29.2	0.7	0	31.2	50th	136	85th	16.9	50th	6.3	9.8	8	162.2	163.9	-0.5	4.3	7.6	16.9	-4.8	-1.1	15.8	-1	-2.7
K	23	85th	121	97th	15.7	50th	8.7	9.2	11.9	163.5	162.1	-2.3	-19.1	-4.3	12.5	2.9	3.7	12.2	3.9	0	33	85th	137	85th	17.6	50th	9.8	7.1	9.4	163.5	163.1	1.1	10.5	0	-8.2	0.5	-1.8	21.7	-0.8	-1.3
K	17	50th	115	85th	12.9	3th	9.5	7.7	9.8	161.2	162.7	-1.1	4.8	1.9	8.7	1	-4.8	13.2	-6.4	1	24.3	15th	132	50th	13.9	15th	6.9	6.8	12	161.2	143.1	0.3	15.8	7.2	28.9	-0.5	4.6	14.1	15.3	3
K	27	97th	123	97th	17.8	85th	10	6.3	7.8	154	163.7	-2	-13.4	-4.8	-4.3	2.4	-6.6	21.9	-3.3	1.5	44.3	97th	141	85th	22.3	97th	0	12.6	13.4	154	167.4	0.7	-2.4	-4.8	13	0	-2.3	20.2	1.7	2.6
K	16	15th	108	50th	13.7	15th	9	6.4	11.2	165.8	164.6	-2.3	-9.5	-2.9	-5.8	-1.4	-5.8	20.1	3.8	-2	27.5	50th	131	50th	16	50th	11.2	7	7.1	165.8	161.7	-0.2	8.6	5.3	9.6	0	2.6	17.4	-0.5	-0.6
K	27	97th	127	97th	16.7	85th	9.1	8.3	7.9	152.3	162.5	-3	-10.5	-1	2.9	-2.9	-8.9	39.3	3.7	-3	47	97th	161	97th	18.1	50th	7.4	11.4	16.3	152.3	161.2	-0.8	-4.3	-5.3	5.3	0.5	-1.4	27.1	-4.1	-1.7
M	19	50th	117	85th	13.9	15th	13.2	8.2	7.9	162.8	158.6	0.9	-1.9	-4.8	-15.9	1.4	-1.3	25.9	-4.4	1.5	26.2	50th	134.5	50th	14.5	50th	11.1	5	12.2	162.8	163.9	0.5	3.8	0	2.9	0	-4	19.6	8.9	-0.8
M	18	50th	112	50th	14.3	15th	8.6	5.4	6.8	168.6	166	-1.7	-12.9	-7.2	-5.8	1.4	-9.6	8.1	7.9	1.3	27.3	50th	133	50th	15.4	50th	7.4	8.8	2.6	168.6	163.8	-2	-1.4	2.9	-22.6	1.9	-0.8	15.9	1.1	-5.2
M	20	50th	119	97th	14.1	15th	13.7	5.8	5.1	165	160.5	0.7	4.8	-2.9	10.6	0	-2.1	19.6	-1.2	-2.5	29.8	50th	137.5	85th	15.8	50th	0	4.9	10.1	165	175.1	0.4	15.8	7.2	2.4	1	-2.9	11	-4.8	3.3
M	21	85th	121	97th	14.3	15th	11.1	4.6	4	160.2	164.3	0.2	0	7.6	12.5	1.9	-5	30.8	12.9	0	33	85th	141	85th	16.6	50th	1.9	8	11.8	160.2	170.1	-1.2	1	5.3	-6.7	1	2.3	9.9	10.1	-1.4
M	16	15th	109	50th	13.5	15th	5.4	12.5	13.5	159.1	162.1	0.4	10.5	3.8	11.6	-2.9	-7.7	13.2	-13.7	-2.9	37.6	97th	136.5	50th	20.2	97th	1.7	7.9	12.9	159.1	170.4	1.8	11	19.1	-7.2	2.4	-1.7	20.1	9.9	-0.6
M	20	50th	113	50th	15.7	50th	2.6	7.8	15	163.6	169.5	-1.9	-3.3	3.3	3.4	2.4	-6.7	25.7	5.7	-2.3	35.7	85th	136.5	50th	19.2	85th	11.5	10	6.6	163.6	158.5	-1.7	4.8	2.9	7.2	0	5.7	20.5	3.3	1
M	21	85th	116	85th	15.6	50th	3.2	7.4	10.9	158.5	169.3	-1	9.5	10.5	10.6	1.9	-5.4	19.1	-1.8	2.5	23	15th	130.5	50th	13.5	15th	12.6	13.9	6.7	158.5	153.5	-1.1	8.1	0	-1.9	4.3	-1.2	12	6.4	2.3
M	20	50th	114	85th	15.4	50th	2.8	4.2	7.9	160.4	173	-1.2	-4.8	7.6	-8.2	7.2	-3.5	18.2	10.9	-1.8	30.6	50th	134	50th	17	50th	5.9	10.3	9.3	160.4	163.8	2.8	-1.4	-11	16.4	-7.2	0	13.5	3.3	-2.3
M	18	50th	116	85th	13.4	15th	8.4	8.7	11.8	161.9	162.9	1.2	10.5	12.4	14.4	6.7	-7	18.1	3.2	0	32.1	50th	141	85th	16.1	50th	2.7	9	9.1	161.9	168.4	0.6	11.5	15.3	4.8	2.4	-1.4	29.1	-4.8	2.5
M	19	50th	115	85th	14.4	15th	7.7	12.7	0	172.4	159.6	-2.2	0	0	0	-1.9	-2.6	16.8	12.4	-2.6	32.4	50th	142	85th	16.1	50th	2.6	1.7	5.9	172.4	175.7	0	-0.5	7.2	2.4	1.4	0.7	8.8	5.9	-0.1
M	19	50th	113	50th	14.9	50th	9.2	9.2	9.5	161.5	161.6	-1.2	-6.7	1.9	-8.7	1	-2.3	9	7.6	-0.7	34.2	85th	136.5	85th	18.4	85th	8.6	7.3	11.2	161.5	164.1	1.4	3.3	-7.6	-0.5	-1	0.7	14.7	-1.7	-1.5
M	18	50th	111	50th	14.6	50th	5.8	14.3	11.5	158.4	159.9	-1.7	-6.7	1	-3.9	1	-5.1	31.4	5.1	-1.7	30.6	50th	133	50th	17.3	50th	14.2	12.1	9.5	158.4	153.6	-0.3	2.9	4.8	2.9	0	-2.4	9.4	19.1	4.3
M	17	15th	114	85th	13.1	15th	7.7	1.3	10	160.7	170.9	0.2	12.4	5.7	10.6	2.9	4.5	18.7	0.4	0.8	37.3	97th	147.5	97th	17.1	50th	6.1	7.4	12	160.7	166.6	2.9	21.5	14.3	20.2	4.8	-1.8	16.1	8.1	-4.8
M	24	97th	124	97th	15.6	50th	10.8	5.1	6.6	162.7	164.1	-2	0	-1	5.8	-1.9	-7.4	23	5.7	3.3	28.3	50th	139.5	85th	14.5	50th	10.7	8.4	9	162.7	161	-0.1	1	6.2	4.8	1.4	-2.8	31.5	-6.3	-1.6
M	20	50th	118	97th	14.4	15th	12.9	5.4	0.8	162.6	161.7	0.3	17.2	3.8	20.2	0	-3.2	17	-4.2	-3.1	25.7	15th	126	15th	16.2	50th	7.7	8.7	8.7	162.6	143.5	0	-20.5	-8.6	6.3	0	0	22.1	-1.4	0.8
M	18	50th	111	50th	14.6	50th	8.5	4.6	14.1	161.6	167	1.2	0	1.4	1.4	2.4	-4.7	23.7	5.7	-5.8	37.3	97th	142	85th	18.5	85th	4.7	7.7	10.8	161.6	167.6	-1.3	6.2	-2.9	1.9	-1	-0.5	14.4	-0.8	6.7
M	23	85th	122	97th	15.5	50th	13.3	5.2	9.4	158.3	161.5	-0.8	-8.6	-1.9	-10.6	2.9	6.8	39.7	-3.9	-4.5	27.7	50th	130.5	50th	16.3	50th	5.2	8.5	13.3	158.3	166.3	0.4	4.8	8.6	-9.6	1	-1.1	11.5	-12.8	-0.8
M	19	50th	109	50th	16	50th	8.5	11.8	8.9	169.8	159.6	0	12.4	8.6	2.9	1.9	-4.8	18.3	0.4	4.4	37.9	97th	142	85th	18.8	85th	6.3	4.2	6	169.8	169.5	-0.4	9.6	4.3	3.4	-1	0.4	20.4	16.8	1.8
M	17	15th	111	50th	13.8	15th	8.4	8.9	8.8	165.6	162.7	-1.8	4.8	-3.8	-3.9	2.9	4.5	10.7	2.1	-2.6	30	50th	140	85th	15.3	50th	13.1	7.6	6.8	165.6	159.3	-1.8	1	4.3	-6.3	0.5	-2.2	43.3	4.3	0
M	23	97th	114	85th	17.7	97th	3.6	13.7	16.8	163.3	162.7	-0.4	-3.8	2.9	-6.7	1	-6.7	20.7	5.8	-0.8	34	85th	135	50th	18.7	85th	7.9	8.9	7.8	163.3	163.2	0.9	-1.4	1.4	-5.8	-1	-1.7	13.7	4.5	-1.2
M	18	50th	109	50th	15.2	50th	9	6.4	11.1	159.3	164.6	-2.8	-15.3	-12.4	-4.8	-1	2.9	5.5	4.4	-1.6	26.2	50th	127	15th	16.2	50th	12.3	9.9	10.9	159.3	157.9	0	-3.3	-7.2	18.3	-1.4	2.1	11.9	1.5	0.2
M	19	50th	111	50th	15.4	50th	4.7	7.1	10.5	157.3	168.3	-0.4	-2.9	-2.4	3.9	0	-2.6	15.1	9.6	-4.1	27.4	50th	131.5	50th	15.8	50th	8.9	14.6	8.1	157.3	156.5	-0.2	5.7	-0.5	13	-0.5	-1.3	19.1	-0.6	-3.8
M	19	50th	115	85th	14.4	15th	4.7	7	7.9	155.2	168.3	-1	0	5.7	5.8	-6.7	-4.5	22.4	0.3	3.2	27.4	50th	138	85th	14.4	15th	1.8	9.6	15.1	155.2	168.6	0.8	-4.8	-5.7	-5.6	2.4	-1.4	8.4	-6.6	-3.6
M	22	85th	116	85th	16.3	50th	9.1	10.1	13.5	159.1	160.8	0	4.8	4.8	1	2.9	5.6	8.9	5.7	-2.3	32.1	85th	134	50th	17.9	85th	6.1	12	9	159.1	161.9	-2.6	4.8	-3.3	4.9	2.4	0.8	20	7.9	-4.3
M	20	50th	119	97th	14.1	15th	10.4	16	11.4	171.9	153.6	-2.6	-3.3	-1	0.5	1.4	-4.2	7.5	-1.5	0.9	28.7	50th	140.5	85th	14.5	50th	15.5	5.4	2.7	171.9	159.1	-0.8	11	6.2	4.8	-1.4	-1.7	25.4	0.7	-4.6
M	22	85th	117	85th	16.1	50th	4.3	4.5	13.9	169.9	171.1	-2.4	-8.6	-11.5	-14.4	-1	-2.3	9.6	0.8	-4.8	37.3	97th	138.5	85th	19.4	85th	3.3	9.4	6	169.9	167.3	0.4	16.2	5.7	0	-0.5	-0.9	11.6	13.4	0.8
M	19	50th	114	85th	14.6	50th	9.3	13.9	9.7	155.8	156.8	1	0	15.3	9.6	0	-3	22.7	2.5	-0.4	28.9	50th	129.5	50th	17.2	50th	2.2	9.5	14.7	155.8	172.6	0.2	6.2	8.1	-1	-7.2	1.3	32.4	11.2	-2.9
M	20	50th	114	85th	15.4	50th	8.8	10.3	14.5	158.5	161	0.9	-7.6	-1	-22.1	-1	-8.5	18.4	0.5	-1.5	27.8	50th	135	50th	15.3	50th	7.1	10.1	11.4	158.5	162.8	0.3	-2.4	-9.1	-14.9	1	-2.9	15.5	5.1	-3.5
M	20	50th	113	50th	15.7	50th	8.7	9.4	7.2	161.1	162	-0.9	3.8	15.3	-1.9	1	-7.3	21.2	5.3	-2.9	34.9	85th	136	50th	18.9	85th	7.4	8.3	10.6	161.1	164.3	-0.4	5.3	9.1	7.7	-0.5	1.2	62.9	2.6	-1.8
M	19	50th	115	85th	14.4	15th	6.2	6.4	13.7	159.3	167.4	1	1.9	5.7	1	1.9	-6.6	14.5	-9.6	0	33.7	85th	140	85th	17.2	50th	7.6	8.6	12.1	159.3	163.8	0.6	4.8	9.6	-9.6	-1.4	-1.3	25.2	6.1	-2.7
M	17	15th	109	50th	14.3	15th	1.3	5.5	7.7	162.9	173.2	-1.6	0	0	-4.8	0	0.9	17.9	4.5	-7.4	30.8	50th	132.5	50th	17.5	85th	5.4	6.2	10.8	162.9	168.4	1.7	1	-1	-18.3	1	-3.3	13.2	-0.3	-1.5
M	19	50th	110	50th	15.7	50th	9.5	4.2	10.2	162.9	166.3	-0.2	-2.9	-5.7	-8.7	1.9	-8.2	9.8	1.7	-0.7	24.4	15th	127.5	15th	15	50th	7.7	7.9	9.3	162.9	164.4	-0.2	-1.9	3.8	-4.3	1.9	1.9	7.1	-0.1	-0.1
M	21	85th	115	85th	15.9	50th	4.9	6.8	7.3	163.8	168.3	-2.5	-2.9	2.9	2.9	1	-2.5	23.2	-0.8	-1.1	32.5	85th	136	50th	17.6	85th	7.5	6.3	6.9	163.8	166.2	0	-4.8	1	-1.4	-0.5	-1.6	32.8	2.8	2.5
M	20	50th	112	50th	15.9	50th	5.6	3.2	6	150.4	171.2	-0.5	-7.6	-10.5	-15.4	-4.8	-4.7	16.6	-12.8	8.6	25.4	15th	131	50th	14.8	50th	18	11	6.8	150.4	151	-0.5	-4.3	1.4	-1	-4.8	0.8	22.1	2.6	-3.6
M	21	85th	120	97th	14.6	50th	3.3	3.8	8.6	161.5	172.9	-4	0	-14.3	13.5	-4.8	-8.3	15.9	-2.2	-4.2	28.8	50th	132	50th	16.5	50th	3.9	8	7.5	161.5	168.1	0	-5.7	2.9	-1.4	-2.4	1.6	26.1	3.2	0
M	19	50th	110	50th	15.7	50th	10.4	8.4	0.8	173.1	161.3	2.5	6.7	1.9	2.9	0	-1.9	26.7	-1.2	0	31.6	85th	139	85th	16.4	50th	9.1	5.7	6.1	173.1	165.2	0.4	7.2	8.6	-2.4	2.4	1.4	39.3	5.5	-2.7
M	19	50th	114	85th	14.6	50th	2.5	9.3	7	160.7	186.9	0.2	-4.3	-10.5	-7.7	2.9	-4.8	8.3	13.2	0.1	26.4	50th	137.5	85th	14	15th	4.8	8.7	10.6	160.7	166.5	-0.4	-3.8	-5.3	-2.9	-1.4	-0.5	10.5	-2.4	-3.6
M	26	97th	121	97th	17.8	97th	9.1	14.4	16.7	156.2	156.5	-2.2	0	-6.7	4.8	-3.8	-6.5	49.7	7.6	-1	45.6	97th	146	97th	21.4	97th	7.6	10.6	13.2	156.2	161.7	-0.1	13.8	-3.3	7.7	-0.5	-3.3	14.2	5.5	0.6
